# Supplementary material for: First-Order Stratigraphic Boundaries of the Late Cretaceous–Paleogene Retroarc Foreland Basin in Colombia
Source: Frontiers journal article supplement (doi:10.3389/feart.2022.876140), 2022-09-12
Supplement: Table_1.xlsx [file Table_1.xlsx]

## Sheet: Sheet1
Basin	Location	Author	Formation	Age	General Description	Environmental Interpretation		Correlation to study area	Thickness [m]
						Prev Studies	This Study
Upper and Middle Magdalena Valley	Piedras	Guerrero et al. (2000) and Bayona (2018)	Seca	Maastrichtian to Middle Paleocene	Gray mudstones with minor interbedding of glauconitic sandstones and coals towards the lower part. While at the upper part reddish siliciclastic sandstones are dominant.	Lower part is Coastal, upper part is flood/alluvial plain.	Lower part: Coastal Plain Upper Part: Marginal Fluvial	N/A Study area indicates period of erosion and no deposition during this time.	30
			La Tabla	Early to Middle Maastrichtian	Coarsening-upward fossiliferous litharenites and sandy biospartites, conglomeratic sandstones and pebble conglomerates toward the top.	Lower part: shallow ramp to shoreface Upper Part: Upper Shoreface to Coastal	Lower part: Lower to Upper Shoreface Upper Part: Upper Shoreface to Coastal Plain	Coastal Plain deposits from Guaduas in Sagu. No record in Wells area.	80
			Buscavidas	Late Campanian to Early Maastrichtian	Coarsening-upward biomicrites and impure (muddy) biomicrites with foraminifera.	Shallow marine ramp	Inner shelf	Shoreface facies from Upper Guadalupe and lower shoreface to inner shelf deposits from Middle Guadalupe in Sagu. In the Wells, it is correlatable to the upper shoreface and coastal facies identified in the lower part of each well.	150
			Upper Lidita	Middle to Late Campanian	Laminated biomicrites and cherts with scarce thin to medium beds of phosphatized bio- and intra-micrites.	Deep carbonate ramp	Inner shelf	Inner shelf facies of the lower part of the Middle Guadalupe in Sagu. Upper and Shoreface deposits in the Wells (restricted info).	60
	Aico	Carvajal et al. (1993), Yepes (2001) and Garzon et al. (2012)	Gualanday	Eocene	Conglomerates interbedded with reddish to gray mottled claystones and mudstones.	Braided fuvial channels	Continental fluvial	Marine facies with thalassinoides from the Carbonera C8 in the Sagu, and lower shoreface facies with ophiomorphas from the Wells.	400
			Seca	Late Maastrichtian to Middle Paleocene	Reddish mottled claystones with conglomeratic levels. In the upper part gypsum and calcite are present in a succession of sandstones with some plant debris.	Continental to marginal	Marginal fluvial	Late Maastrichtian: N/A Study area indicates period of erosion and no deposition during this time. Paleocene: Barco formation in the Sagu creek and the Paleocene facies association 5 in the Wells.	400
			La Tabla	Early to Middle Maastrichtian	Coarsening upwards succession of massive, flasser laminated and cross-bedded medium grained to coarse sandstones. Presence of marine microfossils.	Littoral	Lower to upper shoreface	Coastal Plain deposits from Guaduas in Sagu. No record in Wells area.	180
			Buscavidas	Latest Campanian to Early Maastrichtian	Dominant siltstones with sporadic intervals of thin wavy heterolithic successions between mudstones and very fine grained sandstones. Horizontal burrows. The upper part becomes sandier as the heterolithics are most common and the sandstones are medium to fine grained. High content of marine microfossils.	Shallow marine, near the the fair and storm weather wave base.	Inner shelf	Shoreface facies from Upper Guadalupe and lower shoreface to inner shelf deposits from Middle Guadalupe in Sagu. In the Wells, it is correlatable to the upper shoreface and coastal facies identified in the lower part of each well.	100
			Upper Lidita	Late Campanian	Black to dark chert interbeded with siltstonese and porcelanites. High content of marine microfossils.	Shallow marine, below the the fair and storm weather wave base.	Outer shelf	Lower shoreface and inner shelf deposits from Middle Guadalupe in Sagu. In the Wells, it is correlatable to the upper shoreface and coastal facies identified in the lower part of each well.	50
	Guaduero	Lamus et al. (2013); Bayona et al. (2013) and Bayona (2018)	San Juan de Rio Seco	Middle Eocene to Early Oligocene	Very fine to coarse-grained sandstos and conglomeratic sandstones and conglomerates.	Continental braided to meandering rivers and floodplains	Continental to marginal fluvial	Mirador formation and Carbonera C8 in the Sagu. In the wells it correlates with the Eocene facies association 5 and wih th Oligocene lower shoreface facies.	530
			Seca	Maastrichtian to Middle Paleocene	Gray and reddish mottled mudstones with some very fine to medium sandstones beds.	Floodplains, paleosols and fluvial deposition	Lower part: Coastal Plain Upper Part: Marginal Fluvial	N/A Study area indicates period of erosion and no deposition during this time.	1140
			Umir	Campanian to Early-Middle Mastrichtian	Transition from marine siliciclastic mudstones, siltstones, chert and carbonates to marginal siliciclastic mudstones and sandstones with some carbonates.	Shallow marine with fan deltas to coastal plain	Inner shelf to lower shoreface and coastal plain	Shoreface facies from Upper Guadalupe and lower shoreface to inner shelf deposits from Middle Guadalupe in Sagu. In the Wells, it is correlatable to the upper shoreface and coastal facies identified in the lower part of each well. The lower part of Umir fm correlates with the Lower Guadalupe described by Martinez (2016) in Sagu.	300
	San Juan de Rio Seco	De Porta (1966); Gomez et al. (2003); Bayona et al. (2013); Lamus et al. (2013) and Tchegliakova (1996)	San Juan de Rio Seco	Middle Eocene to Early Oligocene	La Cruz member: cross-bedded coarse conglomeratic sandstones. Almacigos member: mudstones dominated with very thick beds of cross-bedded coarse grained sandstones. Armadillos member: cross-bedded medium to coarse grained sandstone.	Alluvial plain and braided and meandering rivers	Lower part: continental fluvial Upper part: marginal fluvial	Mirador formation and Carbonera C8 in the Sagu. In the wells it correlates with the Eocene facies association 5 and wih th Oligocene lower shoreface facies.	2400
			Hoyon	Middle Paleocene to Early Eocene	Cross-bedded conglomerates in the lower part ,and horizontal laminated and matrix supported conglomerates in upper part. The upper part contains more mudstones intervales.	Alluvial fans	Lower part: continental fluvial Upper part: marginal fluvial	Lower part: Barco formation in the Sagu creek and the Paleocene facies association 5 in the Wells. Upper part: Los Cuervos formation in the Sagu. Facies association 6 in Wells 1 and 2, while Well 3 indicates erosion/non deposition.	960
			Seca	Middle-Late Maastrichtian to Early Paleocene	Intercalation of gray mudstones with corss-bedded medium to coarse grained sandstones that turn conglomeratic in towards the top.	Floodplains, paleosols and fluvial deposition	Lower part: Coastal Plain Upper Part: Marginal Fluvial	N/A Study area indicates period of erosion and no deposition during this time.	450
			Cimarrona	Early to Middle Maastrichtian	Coarsening upwards succession from medium-fine grained sandstones with foraminifera to conglomeratic sandstones with gasteropods, bivalves and ammonites.	Shallow marine with fan deltas to coastal plain	Lower part: Upper shoreface Upper part: Coastal plain	Coastal Plain deposits from Guaduas in Sagu. No record in Wells area.	220
			Umir	Campanian to Early Mastrichtian	Dominant mudstones with foramminifera, bivalves, and ammonites. The presence of thick to very thick fine to very fine wavy laminated sandstones with calcareous concretions is prominent in the upper part.	Shallow marine	Inner shelf and the uppermost is a transition to lower and upper shoreface.	Shoreface facies from Upper Guadalupe and lower shoreface to inner shelf deposits from Middle Guadalupe in Sagu. In the Wells, it is correlatable to the upper shoreface and coastal facies identified in the lower part of each well.	500
	Tesalia	Veloza et al. (2008) and Ferrerira et al. (2002)	Potrerillo	Oligocene	Laminated reddish, greenish and yellowish mudstones and silstones with some very thick beds of conglomerates.	Flood plains	Marginal fluvial	Marine facies with thalassinoides from the Carbonera C8 in the Sagu, and lower shoreface facies with ophiomorphas from the Wells.	150
			Palermo/Bache	Middle Eocene	Lower Part: Coarsening upwards succession from cross bedded very coarse grained sandstones with stilstones lenses; to gravelly conglomerates with very coarse grained sandstones lenses. Upper Part: Mudstones with lenses and very thick beds of gravelly very coarse grained sandstones, with plant debris. Some calcareous sandstones are registered in the middle part.	Lower part: fluvial channels Upper part: floodplains	Lower part: Continental fluvial Upper part: marginal fluvial	Conglomeratic facies of the Mirador formation in Sagu and the intervals with the Eocene facies association 5 in the Wells.	210
			Teruel	Late Paleocene	Very coarse grained sandstones with gravel clasts and siltstones.	Fluvial to coastal plain	Marginal fluvial	Los Cuervos formation in the Sagu. Facies association 6 in Wells 1 and 2, while Well 3 indicates erosion/non deposition.	900
			San Francisco	Early Paleocene	Reddish to gray mottled sandy siltstones with pant debris and roots; paleosols and thick to very thick beds of gravelly coarse grained sandstones.	Fluvial	Continental fluvial	Barco formation in the Sagu creek and the Paleocene facies association 5 in the Wells.	400
			Monserrate	Campanian	Wavy laminated or flasser bedded clayly sandstones with bioturbation and phosphates; with thick intervals dominated by fossiliferous horizontal bedded dark mudstones. These facies are locally calcareous.	Offshore to nearshore	Lower shoreface to inner shelf	Lower shoreface to inner shelf deposits from Middle Guadalupe in Sagu. In the Wells, it is correlatable to the upper shoreface and coastal facies identified in the lower part of each well.	145
	Girardot	De Porta (1966) and Acosta et al. (2002)	Potrerillo	Oligocene	Coarsening upwards bed succession of claystones to gravelly coarse grained sandstones interbedded with claystones.	Alluvial plains to braided fluvial	Continental fluvial	Marine facies with thalassinoides from the Carbonera C8 in the Sagu, and lower shoreface facies with ophiomorphas from the Wells.	350
			Chicoral	Middle Eocene	Coarsening upwards succession from cross bedded medium to coarse grained sandstones interbedded with claystones; to conglomerates and sandstones separated by thick intervals of claystones.	Alluvial to flood plains	Continental fluvial	Conglomeratic facies of the Mirador formation in Sagu and the intervals with the Eocene facies association 5 in the Wells.	170
			Seca	Late Maastrichtian to Middle Paleocene	Lower part: fine grained sandstones interbedded with gray mudstones. Upper part: Reddish mudstones with siltstones with plant debris and sporadic fine grained quartzitic sandstones.	Delta plain to meandering rivers	Lower part: Coastal Plain Upper Part: Marginal Fluvial	Late Maastrichtian: N/A Study area indicates period of erosion and no deposition during this time. Paleocene: Barco formation in the Sagu creek and the Paleocene facies association 5 in the Wells.	300
			La Tabla	Early to Middle Maastrichtian	Coarsening upwards succession from medium-fine grained sandstones with foraminifera to conglomeratic sandstones with gasteropods, bivalves and foramminifera replaced with calcite. Gypsum is reported.	Shoreface to coastal plain	Lower to upper shoreface	Shoreface facies from Upper Guadalupes. No Maastrichtian record from Wells area.	115
			Nivel de Lutitas y Arenas	Campanian to Early Mastrichtian	Horizontal laminated and sporadic wavy laminated calcareous siltstones with foramminifera and ichnofossils, interbedded with calcareous mudstones. Some beds of fine to very fine grained sandstones is registered, as well as gypsum layers.	Calcareous shelf	Inner shelf	Shoreface facies from Upper Guadalupe and lower shoreface to inner shelf deposits from Middle Guadalupe in Sagu. In the Wells, it is correlatable to the upper shoreface and coastal facies identified in the lower part of each well.	242
Eastern Cordillera Basin and Foothills	Medina	Guerrero y Sarmiento (1996), Parra et al. (2010), Jaramillo (1999) and Jaramillo and Dilcher (2000)	Carbonera C8 / San Fernando	Early Oligocene	Drak-gray to greenish mudstone. Occassional minor bioturbation. Limited interbeds of trough cross-laminated sandstone. Local microforaminiferal linings and dinoflagellates.	Transitional environment, lakes, prodelta or estuaries	Inner shelf	Marine facies with thalassinoides from the Carbonera C8 in the Sagu, and lower shoreface facies with ophiomorphas from the Wells.	300
			Mirador / Areniscas de El Limbo	Lower to Middle Eocene	Massive and cross-bedded conglomeratic and coarse sandstones with the occurrence of gravelly conglomeratic beds.	Braided fluvial channels	Continental fluvial	Conglomeratic facies of the Mirador formation in Sagu and the intervals with the Eocene facies association 5 in the Wells.	200
			Upper Socha / Arcillas de El Limbo	Upper Paleocene	Light grey, purple and green claystones and siltstones with plant debris and occasional fine to medium cross-bedded sandstones. Lower part registers bioturbation and some brackish palynomorphs.	Flood plains and channel fills from Coastal/Deltaic plain	Coastal plain	Los Cuervos formation in the Sagu. Facies association 6 in Wells 1 and 2, while Well 3 indicates erosion/non deposition.	400
			Lower Socha	Early Paleocene	Cross-bedded medium to coarse and occassionally conglomeratic sandstones with some intervals of reddish to gray siltstones and mudstones with plant debris.	Braided fluvial channels and floodplain deposits in a continental setting	Continental fluvial	Barco formation in the Sagu creek and the Paleocene facies association 5 in the Wells.	225
			Guaduas	Middle to Late Maastrichtian	Gray siltstones with plant debris interbedded with thin to very thin quartzitic very fine grained sandstones; and gray to black carbonaceous mudstones with plant debris.	Swap, lakes and bays. Coal seems associated to estuaries	Coastal plain	Coastal Plain deposits from Guaduas in Sagu. No record in Wells area.	60
			Arenitas de San Luis de Gaceno	Early to Middle Maastrichtian	Dominant medium to coarse grained sandstones with cross bedding, bivalves, horizontal burrows and wavy lamination. Lower part contains a ±15 m heterolithic succesion.	From top to bottom: foreshore to Lower Shoreface.	Lower part: Lower to Upper Shoreface Upper Part: Upper Shoreface	Shoreface facies from Upper Guadalupes. No Maastrichtian record from Wells area.	150
			Lodolitas de Aguascalientes	Middle to Late Campanian	Dominant black mudstones with some intervals of very fine sandstones with phosphorous, gasteropods, rhizocorallium, bivalves and horizontal burrows.	Deposition below the fair and storm weather wave base.	Inner shelf	Lower shoreface and inner shelf deposits from Middle Guadalupe in Sagu. In the Wells, it is correlatable to the upper shoreface and coastal facies identified in the lower part of each well.	180
			Arenitas de San Antonio	Early to Middle Campanian	Fine to medium grained sandstones with horizontal burrows, phosphorous and glauconite, and some intervals of black mudstones and heterolithics.	Lower to upper shoreface	Lower to upper shoreface	No checked in the area. But according to Martinez (2006) it is correlatable with Lower Guadalupe in the Sagu area.	200
	Umbita	Bayona et al. (2013) and Ulloa et al. (1975)	Concentracion	Early Oligocene	Gray to reddish and greenish silstones and claystones interlayered with sandstones and some conglomerates.	Coastal and marginal swamps	Coastal plain	Marine facies with thalassinoides from the Carbonera C8 in the Sagu, and lower shoreface facies with ophiomorphas from the Wells.	200
			Picacho	Middle to Late Eocene	Conglomeratic medium to coarse grained feldspatic sandstones with conglomeratic lenses and often interbedded with claystones.	Fluvial	Continental fluvial	Conglomeratic facies of the Mirador formation in Sagu and the intervals with the Eocene facies association 5 in the Wells.	300
			Upper Socha	Late Paleocene to Early Eocene	Dominant claystones and siltstones interbedded with fine to medium grained sandstones.	Fluvial	Marginal fluvial	Los Cuervos formation in the Sagu. Facies association 6 in Wells 1 and 2, while Well 3 indicates erosion/non deposition.	400
			Lower Socha/Cacho	Middle Paleocene	Medium to coarse and often conglomeratic quartzitic sandstones with an interval of interbedded sandstones and siltstones in the middle part of the unit.	Fluvial	Continental fluvial	Barco formation in the Sagu creek and the Paleocene facies association 5 in the Wells.	180
			Guaduas	Middle Maastrichtian to Early Paleoce	Dark to gray claystones and siltstones intercalated with fine to medium grained sandstones that are often conglomeratic in the upper part. Very thick coal seams are reported in the middle part of the unit.	Littoral to continental marine	Lower part: Coastal Plain Upper Part: Marginal Fluvial	N/A as Sagu and Wells area under erosion.	440
			Tierna	Early Maastrichtian	Fine to coarse grained quartzitic sandstones interbedded with dark to black lutites.	Shallow marine to deltaic	Upper shoreface	Shoreface facies from Upper Guadalupe and coastal plain deposits from Guaduas in Sagu. No Maastrichtian record from Wells area.	100
			Labor	Late Campanian	Fine to grained quartzitic sandstones interbedded with dark to black lutites.	Shallow marine	Lower shoreface	Lower shoreface and inner shelf deposits from Middle Guadalupe in Sagu. In the Wells, it is correlatable to the upper shoreface and coastal facies identified in the lower part of each well.	130
			Plaeners	Middle Campanian	Siliceous siltstones, lutites and very fine to fine grained sandstones.	Shallow marine	Inner shelf	No checked in the area. But according to Martinez (2006) it is correlatable with Lower Guadalupe in the Sagu area.	100
	Bogota	Perez & Salazar (1978), Sarmiento (1992), Vergara y Rodriguez (1997), Acosta et al. (2002) and Bayona et al. (2010)	Usme	Early Oligocene	Massive to cross bedded coarse to medium grained sandstones with gray to reddish and often mottled massive mudstones.	Swamps, floodplains and channels deposition	Coastal plain	Marine facies with thalassinoides from the Carbonera C8 in the Sagu, and lower shoreface facies with ophiomorphas from the Wells.	350
			Regadera	Middle to Late Eocene	Horizontal-, cross-bedded and massive medium to coarse grained sandstones often mottled with massive mottled to reddish mudstones. Some intervals have roots, indicating paleosols.	Channel fills and floodplains	Continental fluvial	Conglomeratic facies of the Mirador formation in Sagu and the intervals with the Eocene facies association 5 in the Wells.	150
			Bogota	Late Paleocene to Early Eocene	Horizontal to trough cross bedded medium to coarse grained sandstones, often wavy laminated, interbedded with gray to reddish and mottled massive mudstones and siltstones. Presence of tuffs.	Swamps, floodplains and channels deposition, close to areas with volcanism.	Marginal fluvial	Los Cuervos formation in the Sagu. Facies association 6 in Wells 1 and 2, while Well 3 indicates erosion/non deposition.	1420
			Cacho	Middle Paleocene	Horizontal-, cross-bedded and massive medium to coarse grained sandstones often mottled, interbedded with gray massive mudstones. In some parts heterolithic sedimentation.	Swamps, floodplains, channels deposition.	Continental fluvial	Barco formation in the Sagu creek and the Paleocene facies association 5 in the Wells.	103
			Guaduas	Middle Maastrichtian to Early Paleoce	Lower part: Massive coarse to medium grained sandstones interbedded with laminated and massive mudstones. This interval contains Coal seams. Hetherolithic intervals. Upper part: Massive coarse to medium grained sandstones interbedded with reddish to mottled mudstones and heterolithic deposits.	Lower part: coastal plain and fluvial channels Upper part: fluvial and floodplains	Lower part: Coastal Plain Upper part: Marginal Fluvial	N/A as Sagu and Wells area under erosion.	900
			Tierna	Early Maastrichtian	Thick beds of cross-bedded sandstones with a few thin to medium beds of siltstones and mudstones that dissappear towards the top. Phosphatic nodules, fish bones, glauconite, and horizontal ichnofacies (skolithos and cruziana).	Littoral	Upper shoreface	Shoreface facies from Upper Guadalupe and coastal plain deposits from Guaduas in Sagu. No Maastrichtian record from Wells area.	50
			Labor	Late Campanian	Thick to very thick beds of clayly fine to medium grained sandstones with sporadic phosphatic nodules, fish bones and ichnofacies (often horizontal). These intervals are separated by very thin beds of claystones and mudstones.	Shallow marine, between the the fair and storm weather wave base.	Lower Shoreface	Lower shoreface and inner shelf deposits from Middle Guadalupe in Sagu. In the Wells, it is correlatable to the upper shoreface and coastal facies identified in the lower part of each well.	180
			Plaeners	Middle Campanian	Siliceous siltstones and claystones, lutites and very fine grained sandstones interbedded with mudstones and siltstones. This interval is highly fossiliferous (e.g., fish bones) but with low content of ichnofacies. Horizontal and wavy lamination is dominant.	Shallow marine	Inner shelf	No checked in the area. But according to Martinez (2006) it is correlatable with Lower Guadalupe in the Sagu area.	80
	Fusa	Acosta & Ulloa (2001) and Bayona et al. (2003)	Unit III/Bogota	Late Eocene to Early Oligocene	Decametric sequences of massive, sandy light gray to red mottled mudstones interbedded with metric sequences of medium to thick beds of fine to medium grained sublitharenites, litharenites and subarkoses to the top.	Alluvial to coastal plain	Coastal plain	Marine facies with thalassinoides from the Carbonera C8 in the Sagu, and lower shoreface facies with ophiomorphas from the Wells.	±1200
			Unit II/Cacho	Middle Eocene	Fining-upward successions of green to gray, fine to medium grained sandstones interbedded with light gray, massive and sandy mudstones. Sandstones are dominantly massive and ripple-wavy laminated at the bottom; trough cross bedding in isolated cosets.	Coastal plain	Continental fluvial	Conglomeratic facies of the Mirador formation in Sagu and the intervals with the Eocene facies association 5 in the Wells.	±150
			Unit I/Guaduas	Early to Middle Paleocene	Green, wavy-laminated mudstones with excellent record of plant remains. Thin to medium beds of ripple-laminated, fine grained iron-rich quartzarenites dominates at the bottom. The middle to top is dominated by coarsening upwards sequences or interbedded mudstones.	Coastal plain	Marginal fluvial	Barco formation in the Sagu creek and the Paleocene facies association 5 in the Wells.	400
			Labor	Late Campanian	Fine to medium grained sandstones in thick to very thick beds.	Littoral to sublittoral	Lower Shoreface	Lower shoreface and inner shelf deposits from Middle Guadalupe in Sagu. In the Wells, it is correlatable to the upper shoreface and coastal facies identified in the lower part of each well.	100
			Plaeners	Middle Campanian	Thin beds of siliceous siltstones with foramminifera interbedded with gray mudstones.	Littoral to sublittoral	Inner shelf	No checked in the area. But according to Martinez (2006) it is correlatable with Lower Guadalupe in the Sagu area.	70
	Uribe	Buchely et al. (2015) and Buchely (2015)	San Fernando	Oligocene	Gray siltstones and mudstones with plant debris interbedded with thin beds of medium to coarse grained quartzitic cross-bedded sandstones.	Lacustrine	Coastal plain	Marine facies with thalassinoides from the Carbonera C8 in the Sagu, and lower shoreface facies with ophiomorphas from the Wells.	30
			Mirador*	Eocene*	Conglomeratese, medium-coarse grained quartzitic conglomeratic sandstones, and siltstones in subtabular to tabular beds.	Braided fluvial	Continental-Marginal fluvial	Conglomeratic facies of the Mirador formation in Sagu and the intervals with the Eocene facies association 5 in the Wells.	20
			Palmichal Gp.	Campanian	Dominant fine to medium grained sandstones with horizontal bedding and some wavy bedding. The succession contains very thick beds of conglomerates with cross-bedding, as well as some beds of gray siltstones.	Delta plain	Upper shoreface to coastal plain	Lower shoreface to inner shelf deposits from Middle Guadalupe in Sagu. In the Wells, it is correlatable to the upper shoreface and coastal facies identified in the lower part of each well.	140
